# Supplementary material for: Growth rate rather than temperature affects the B / Ca ratio in thecalcareous red alga Lithothamnion corallioides
Source: Copernicus journal article supplement (doi:10.5194/bg-2021-21), 2021-02-04
Supplement: Supplementary file [file bg-2021-21-AC2-supplement.pdf]

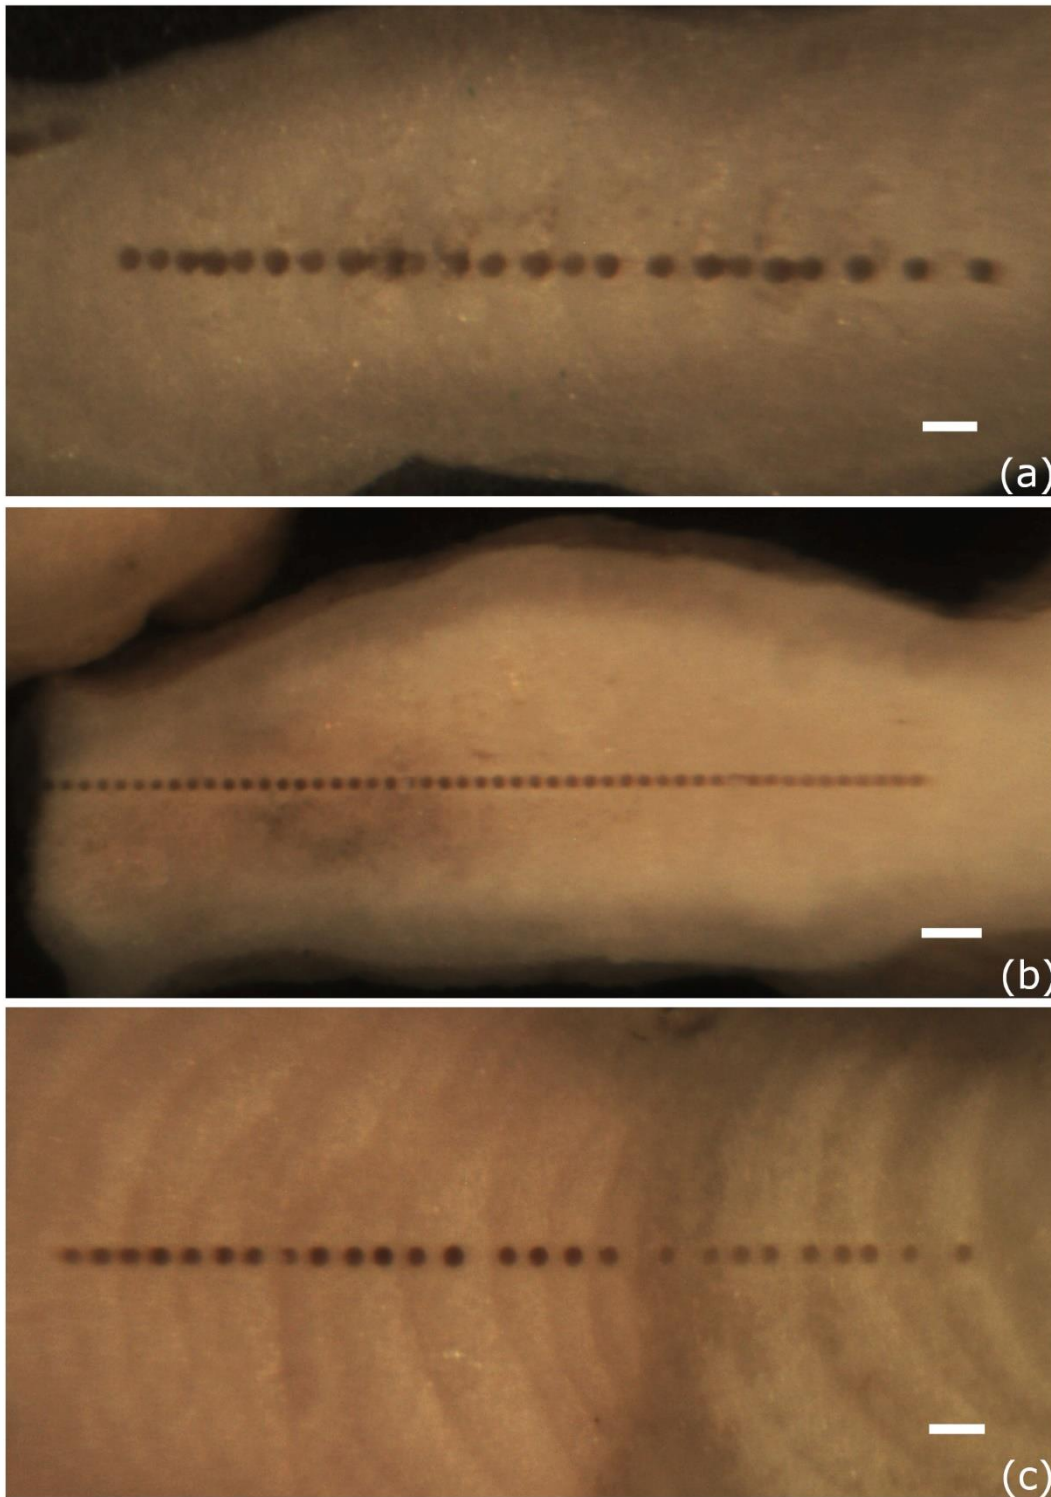

**Figure S1: Longitudinal section through the *L. corallioides* branch sampled in (a) Aegadian Isl. (scale bar = 100  $\mu\text{m}$ ), (b) Elba (scale bar = 350  $\mu\text{m}$ ) and (c) Pontian Isl. (scale bar = 200  $\mu\text{m}$ ), showing the LA-ICP-MS transects targeting each growth bands.**
